# Supplementary material for: Cerebrospinal fluid findings in patients with myelin oligodendrocyte glycoprotein (MOG) antibodies. Part 2: Results from 108 lumbar punctures in 80 pediatric patients
Source: Springer Nature journal article supplement (doi:10.1186/s12974-020-01825-1), 2020-09-03
Supplement: MOESM1 [file 18345738]

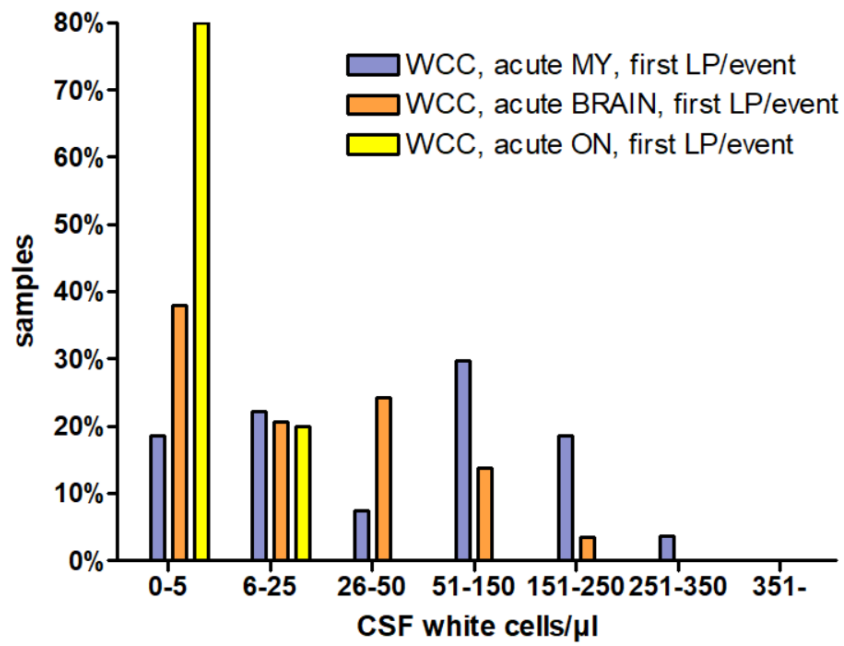

**Supplementary Figure 1.** CSF white cell counts in the 'acute MY subgroup', the 'acute BRAIN subgroup', and the 'acute ON subgroup'.
