# Supplementary material for: Cerebrospinal fluid findings in patients with myelin oligodendrocyte glycoprotein (MOG) antibodies. Part 2: Results from 108 lumbar punctures in 80 pediatric patients
Source: Springer Nature journal article supplement (doi:10.1186/s12974-020-01825-1), 2020-09-03
Supplement: MOESM3 [file 18345738]

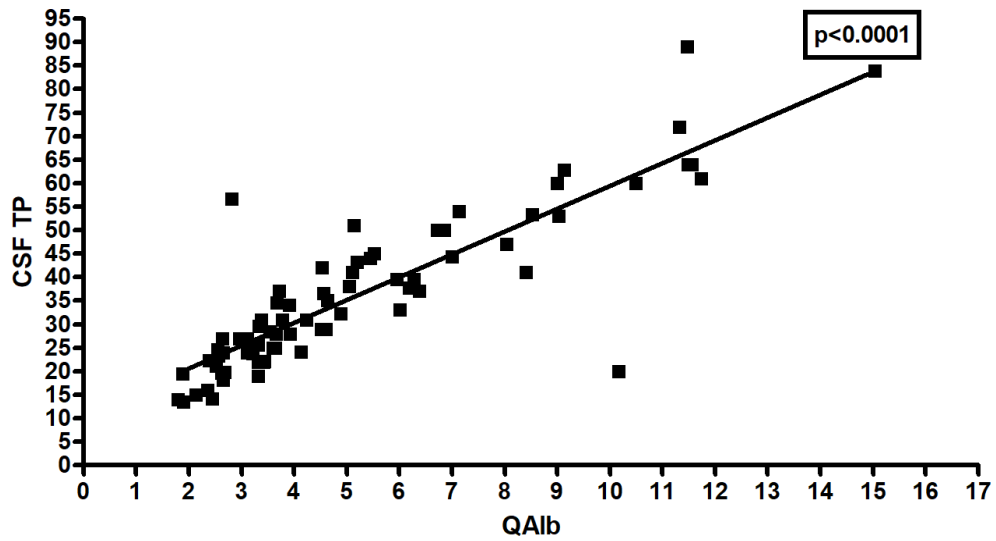

**Supplementary Figure 3.** Regression analysis of QAlb and CSF total protein, demonstrating a close relationship between the two parameters ( $r^2=0.75$ ,  $p<0.00001$ ). CSF = cerebrospinal fluid; QAlb = albumin CSF/serum ratio; TP = total protein.
