# Supplementary material for: Cerebrospinal fluid findings in patients with myelin oligodendrocyte glycoprotein (MOG) antibodies. Part 2: Results from 108 lumbar punctures in 80 pediatric patients
Source: Springer Nature journal article supplement (doi:10.1186/s12974-020-01825-1), 2020-09-03
Supplement: MOESM4 [file 18345738]

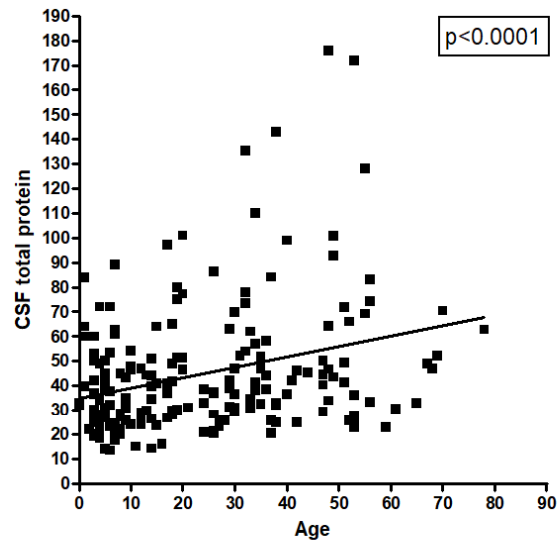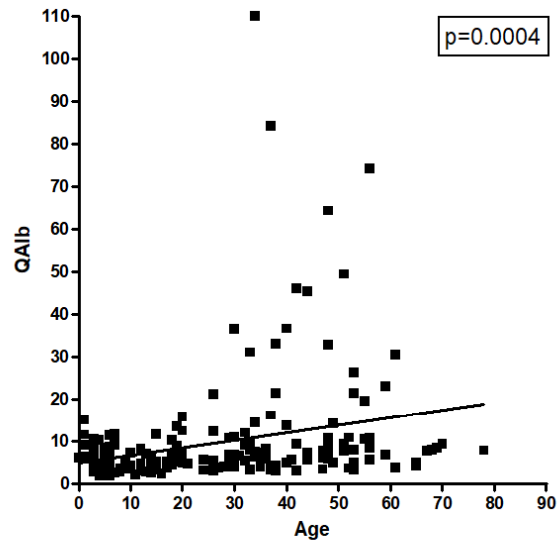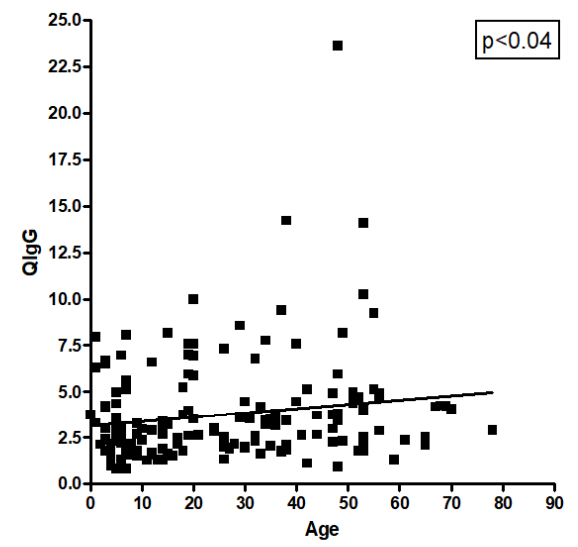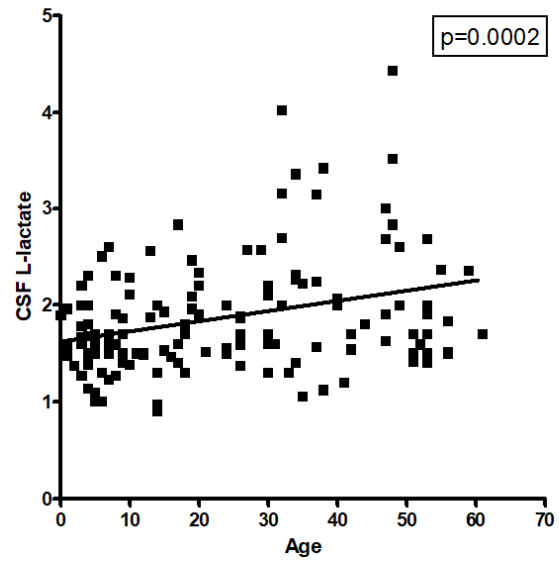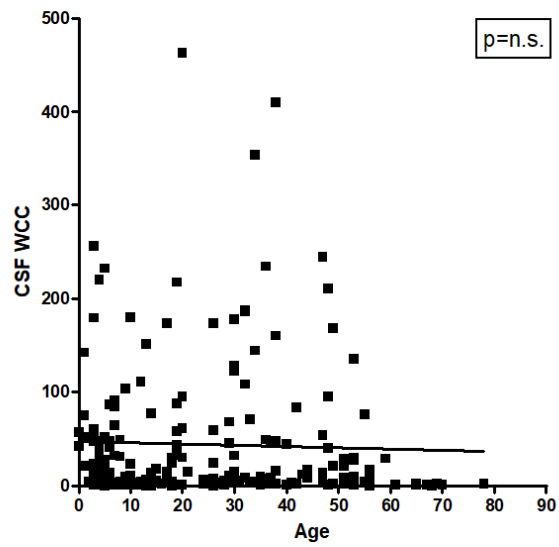

**Supplementary Figure 4.** Influence of age at LP on CSF parameters as detected by a pooled linear regression analysis of data from the pediatric and the adult cohort ( $r^2=0.089$  for CSF TP,  $p<0.0001$ ;  $r^2=0.064$  for QAlb,  $p=0.0004$ ;  $r^2=0.027$  for QIgG,  $p<0.04$ ;  $r^2=0.097$  for CSF L-lactate,  $p=0.0002$ ). By contrast, no significant relationship was observed when the two cohort were analysed separately (not shown). CSF = cerebrospinal fluid; LP = lumbar puncture; QAlb = albumin CSF/serum ratio; QIgG = IgG CSF/serum ratio; TP = total protein; WCC = white cell count.
