# Supplementary material for: Cerebrospinal fluid findings in patients with myelin oligodendrocyte glycoprotein (MOG) antibodies. Part 2: Results from 108 lumbar punctures in 80 pediatric patients
Source: Springer Nature journal article supplement (doi:10.1186/s12974-020-01825-1), 2020-09-03
Supplement: MOESM6 [file 18345738]

|         | LP #1                              | LP #2                              | LP #3                        |
|---------|------------------------------------|------------------------------------|------------------------------|
| Pat. #1 | <b>OCB +/2</b> , M, A,<br>QIgG neg | OCB -/1, M, Rem,<br>QIgG neg       | Not done                     |
| Pat. #2 | OCB -/1, B, A,<br>QIgG neg         | <b>OCB +/2</b> , B, A,<br>QIgG neg | Not done                     |
| Pat. #3 | OCB -/4, B, A,<br>QIgG nd          | OCB -/1, B, Rem,<br>QIgG neg       | Not done                     |
| Pat. #4 | OCB -/4, M, A,<br>QIgG nd          | OCB -/1, M, A,<br>QIgG nd          | OCB -/4, M, Rem,<br>QIgG neg |

**Supplementary Table 2.** Variations in OCB positivity over time. In 1 patient, OCB disappeared over the course of disease (absent 61 days after the initial LP following steroid treatment and during remission); in 1 patient, OCB were absent in the initial sample but were detectable in a follow-up sample taken 24 days later, respectively. Note that QIgG was normal in the OCB-positive samples, indicating low levels of intrathecal IgG synthesis. A = acute attack; B = brain/brainstem/cerebellar disease (last attack before LP); M = myelitis (last attack before LP); OCB = oligoclonal bands; ON = optic neuritis (last attack before LP); QIgG = CSF/serum immunoglobulin G ratio; Rem = remission
