# Supplementary material for: Cerebrospinal fluid findings in patients with myelin oligodendrocyte glycoprotein (MOG) antibodies. Part 2: Results from 108 lumbar punctures in 80 pediatric patients
Source: Springer Nature journal article supplement (doi:10.1186/s12974-020-01825-1), 2020-09-03
Supplement: MOESM7 [file 18345738]

|                                           | Units                          | Acute LETM, first<br>LP/event | Acute NETM, first<br>LP/event |
|-------------------------------------------|--------------------------------|-------------------------------|-------------------------------|
| Pleocytosis                               | <i>samples</i>                 | 19/22 (86.4%)                 | 3/5 (60%)                     |
| WCC                                       | <i>cells/<math>\mu</math>l</i> | 58 (2-232;22)                 | 31 (4-256;5)                  |
| WCC >100/ $\mu$ l*                        | <i>samples</i>                 | 8/22 (36.4%)                  | 1/5 (20%)                     |
| OCB                                       | <i>samples</i>                 | 5/22 (22.7%)                  | 2/5 (40%)                     |
| IgG-IF >10%                               | <i>samples</i>                 | 3/16 (18.8%)                  | 0/5 (0%)                      |
| QAlb > Qlim(Alb)                          | <i>samples</i>                 | 12/17 (70.6%)                 | 2/5 (40%)                     |
| CSF TP elevated                           | <i>samples</i>                 | 9/20 (45%)                    | 1/5 (20%)                     |
| CSF TP concentrations                     | <i>mg/dl</i>                   | 44.3 (25-89;21)               | 28.4 (14-60;5)                |
| CSF L-lactate elevated <sup>§</sup>       | <i>samples</i>                 | 8/16 (50%)                    | 2/4 (50%)                     |
| CSF L-lactate concentrations <sup>#</sup> | <i>mg/dl</i>                   | 1.79 (1.38-2.6;16)            | 1.85 (1.6-2.3;4)              |
| Time since attack onset                   | <i>days</i>                    | 2 (0-23;23)                   | 7 (2-33;5)                    |

**Supplementary Table 3.** CSF findings in MOG-IgG-positive acute longitudinally extensive transverse myelitis (LETM) and MOG-IgG-positive non-longitudinally extensive transverse myelitis (NETM). Note that only the first LP obtained during an acute event was considered for this analysis to control for the fact that the number of CSF samples obtained per event differed among patients. \*p=n.s.; <sup>§</sup>p=n.s.; <sup>#</sup>p=n.s. CSF = cerebrospinal fluid; IgG-IF = intrathecally produced CSF IgG fraction; OCB = oligoclonal bands; QAlb = CSF/serum albumin quotient; TP = total protein; WCC = white cell count.
