# Supplementary material for: Cerebrospinal fluid findings in patients with myelin oligodendrocyte glycoprotein (MOG) antibodies. Part 2: Results from 108 lumbar punctures in 80 pediatric patients
Source: Springer Nature journal article supplement (doi:10.1186/s12974-020-01825-1), 2020-09-03
Supplement: MOESM8 [file 18345738]

|                              | Units                          | Acute bilateral ON,<br>first LP/event | Acute unilateral ON,<br>first LP/event |
|------------------------------|--------------------------------|---------------------------------------|----------------------------------------|
| Pleocytosis*                 | <i>samples</i>                 | 3/11 (27.3%)                          | 2/14 (14.3%)                           |
| WCC                          | <i>cells/<math>\mu</math>l</i> | 3 (0-18;2)                            | 1 (0-9;2)                              |
| WCC >100                     | <i>samples</i>                 | 0/11 (0%)                             | 0/14 (0%)                              |
| OCB                          | <i>samples</i>                 | 0/11 (0%)                             | 0/15 (0%)                              |
| IgG-IF >10%                  | <i>samples</i>                 | 0/10 (0%)                             | 0/9 (0%)                               |
| QAlb > Qlim(Alb)             | <i>samples</i>                 | 2/10 (20%)                            | 3/10 (30%)                             |
| CSF TP elevated              | <i>samples</i>                 | 1/11 (9.1%)                           | 0/13 (0%)                              |
| CSF TP concentrations        | <i>mg/dl</i>                   | 24 (13.4-64;13)                       | 26.5 (15-44;12)                        |
| CSF L-lactate elevated       | <i>samples</i>                 | 2/10 (20%)                            | 1/10 (10%)                             |
| CSF L-lactate concentrations | <i>mg/dl</i>                   | 1.5 (1-2.3;10)                        | 1.5 (0.97-2.56;10)                     |
| Time since attack onset      | <i>days</i>                    | 4 (0-10;13)                           | 3 (0-40;17)                            |

**Supplementary Table 4.** CSF findings in MOG-IgG-positive acute bilateral ON and in MOG-IgG-positive acute unilateral ON. Note that only the first LP obtained during each acute event was taken into account for this analysis to control for the fact that the number of CSF samples obtained per event differed among patients. \*p=n.s. IgG-IF = intrathecal IgG fraction; OCB = oligoclonal bands; QAlb = CSF/serum albumin quotient; TP = total protein; WCC = white cell count.
